# Supplementary material
Source: publisher figshare collection journal article supplement (https://sage.figshare.com/ndownloader/files/13438565)
Supplement: Supplementary file 1 [file 13438565]

|                                                                                                                                                                                                                                                                                  |
|----------------------------------------------------------------------------------------------------------------------------------------------------------------------------------------------------------------------------------------------------------------------------------|
| Allen, V. L., & Feldman, R. S. (1973). Learning through tutoring: Low-achieving children as Tutors. <i>Journal of Experimental Education</i> , 42, 1-5.                                                                                                                          |
| Bar-Eli, N., & Raviv, A. (1982). Underachievers as tutors. <i>Journal of Educational Research</i> , 75, 139-143.                                                                                                                                                                 |
| Barron, Anne-Marie, & Foot, H. (1991). Peer tutoring and tutor training. <i>Educational Research</i> , 33, 174-185.                                                                                                                                                              |
| Carr, W. D., Volberding, J., & Vardiman, P. (2011). A peer-assisted learning program and its effect on student skill demonstration. <i>Athletic Training Education Journal</i> , 6, 129-135.                                                                                     |
| Cochran, L., Feng, H., Cartledge, G., & Hamilton, S. (1993). The effects of cross-age tutoring on the academic achievement, social behaviors, and self perceptions of low-achieving African-American males with behavioral disorders. <i>Behavioral Disorders</i> , 18, 292-302. |
| Ehly, S., Keith, T. Z., & Bratton, B. (1987). The benefits of tutoring: An exploration of expectancy and outcomes. <i>Contemporary Educational Psychology</i> , 12, 131-134.                                                                                                     |
| Flores, M., & Duran, D. (2016). Influence of a catalan peer tutoring programme on reading comprehension and self-concept as a reader. <i>Journal of Research in Reading</i> , 39, 330-346. doi: 10.1111/1467-9817.12044.                                                         |
| Goyen, J. D., & McClelland, D. J. (1994). Pause, prompt, and praise: The need for more research. <i>Journal of Research in Reading</i> , 17, 108-119.                                                                                                                            |
| Iwata, K., Furmedge, D. S., Sturrock, A., & Gill, D. (2014). Learning through tutoring: Low-achieving children as Tutors. <i>Medicine Education</i> , 48, 698-704. doi: 10.1111/medu.12475.                                                                                      |
| Judy, J. E., Alexander, P. A., Kulikowich, J. M., & Willson, V. L. (1988). Effects of two instructional approaches and peer tutoring on gifted and nongifted sixth-grade students' analogy performance. <i>Reading Research Quarterly</i> , 23, 236-256.                         |
| Limbrick, E., McNaughton, S., & Glynn, T. (1985). Reading gains for underachieving tutors and tutees in a cross-age tutoring programme. <i>Journal of Child Psychology &amp; Psychiatry &amp; Allied Disciplines</i> , 26, 939-953.                                              |
| Marieswari, M., & Prema, N. (2016). Effectiveness of peer tutoring in learning English among tutors and tutees of class VIII students in Kancheepuram DT. <i>English Language Teaching</i> , 9, 1-5.                                                                             |
| Menesses, K. F., & Gresham, F. M. (2009). Relative efficacy of reciprocal and nonreciprocal peer tutoring for students at-risk for academic failure. <i>School Psychology Quarterly</i> , 24, 266-275. doi: 10.1037/a0018174.                                                    |
| Shamir, A., Korat, O., & Barbi, N. (2008). The effects of CD-ROM storybook reading on low SES kindergarteners' emergent literacy as a function of learning context. <i>Computers and Education</i> , 51, 354-367. doi:10.1016/j.compedu.2007.05.010.                             |

Top, B. L., & Osguthorpe, R. T. (1987). Reverse-role tutoring: The effects of handicapped students tutoring regular class students. *The Elementary School Journal*, 87, 413-423.

Van Keer, H., & Vanderlinde R. (2010). The impact of cross-age peer tutoring on third and sixth graders' reading strategy awareness, reading strategy use, and reading comprehension. *Middle Grades Research Journal*, 5, 33–45.
